# Supplementary material
Source: publisher figshare collection journal article supplement (https://gsapubs.figshare.com/ndownloader/files/37393858)
Supplement: Supplementary file 1 [file 37393858]

## Sheet: Table_S1
TABLE S1. SAMPLE LOCATION AND ORIENTATION
Name	Longitude	Latitude	Type	Orientation	Dip
GC1-1	2°49'11.58"E	45°34'00.78"N	core	84	78
GC1-2a			core	85	84
GC1-2b			core	88	93
GC1-3a			core	87	83
GC1-3b			core	93	90
GC1-3c			core	92	88
GC1-4a			core	95	80
GC1-4b			core	91	82
GC1-5a			core	90	81
GC1-5b			core	95	78
GC2-1	2°49'08.06"E	45°33'56.71"N	core	229	62
GC2-2			core	229	70
GC2-3			core	240	70
GC2-4			core	248	62
GC2-5			core	202	89
GC2-6			core	197	92
GC2-6a			core	345	24
GC3-1	2°49'11.44"E	45°33'57.98"N	core	182	75
GC3-2			core	171	88
GC3-2a			hand sample	248	72
GC3-3			core	184	90
GC3-4			core	174	96
GC3-5			core	176	98
GC4-1	2°49'11.52"E	45°34'00.42"N	hand sample	277	15
GC4-2			hand sample	96	88
GC4-3	2°49'12.04"E	45°33'59.16"N	hand sample	162	135
GC4-4a			hand sample	175	68
GC4-4b			hand sample	103	88
GC4-5			hand sample	214	76
GC5-1	2°49'14.79"E	45°33'56.92"N	core	295	8
GC5-2			core	307	9
GC5-3			core	324	12
GC5-4			core	37	22
GC5-5			core	36	14
GC5-6			core	128	13
GC5-7			core	298	4
GC5-8			core	356	21
GC5-9			core	71	6
GC5-10			core	264	2
GC6-1	2°49'13.71"E	45°34'01.41"N	hand sample	133	81
GC7-1	2°49'13.05"E	45°34'02.27"N	hand sample	328	66
